# Supplementary material
Source: MDPI journal article supplement (https://www.mdpi.com/2297-8739/9/11/345)
Supplement: s1 [file separations-1995461-supplementary edited 3112022 (1).pdf › separations-1995461-supplementary edited 3112022 (1).pdf]

# Supplementary Material

## RP-HPLC-DAD analysis of mitragynine content in *Mitragyna speciosa* Korth. (Ketum) leaf extracts prepared using Ultrasound Assisted Extraction Technique and their cytotoxicity

Thiruventhan Karunakaran <sup>1,2\*</sup>, Yong Sean Goh <sup>1</sup>, Rameshkumar Santhanam<sup>3</sup>, Vikneswaran Murugaiyah<sup>4</sup>, Mohamad Hafizi Abu Bakar <sup>5</sup> and Surash Ramanathan <sup>1</sup>

<sup>1</sup> Centre for Drug Research, Universiti Sains Malaysia, 11800 USM, Pulau Pinang, Malaysia

<sup>2</sup> School of Chemical Sciences, Universiti Sains Malaysia, 11800 USM, Pulau Pinang, Malaysia

<sup>3</sup> Faculty of Science and Marine Environment, University Malaysia Terengganu, 21030 Kuala Nerus, Malaysia

<sup>4</sup> School of Pharmaceutical Sciences, Universiti Sains Malaysia, 11800 USM, Pulau Pinang, Malaysia

<sup>5</sup> Bioprocess Technology Division, School of Industrial Technology, Universiti Sains Malaysia, 11800, USM, Penang, Malaysia

\* Correspondence: thiruventhan@usm.my; Tel: +604-6533287

**Table S1.** Chemicals and Reagents.

| Chemicals and Reagents                                                                                                                                                                       | Vendors                                                      |
|----------------------------------------------------------------------------------------------------------------------------------------------------------------------------------------------|--------------------------------------------------------------|
| Methanol (HPLC grade), Silica gel 60, and Deuterated acetone (acetone- <i>d</i> <sub>6</sub> ) used for NMR analysis,                                                                        | Merck (Darmstadt, Germany)                                   |
| Methanol (Analytical grade) and formic acid (Analytical grade)                                                                                                                               | Fisher Scientific (Loughborough, UK)                         |
| Ethyl acetate (Analytical grade) and acetonitrile (HPLC grade)                                                                                                                               | QReC (Asia) Chemical Co. Ltd (Selangor, Malaysia).           |
| Ethanol (Analytical grade) and hexane (Analytical grade)                                                                                                                                     | R&M Chemicals (Essex, UK)                                    |
| Sephadex LH-20                                                                                                                                                                               | Sigma-Aldrich Co. (St. Louis, Missouri, USA)                 |
| Mitragynine standard (purity ≥ 99 %)                                                                                                                                                         | ChromaDex Inc. (California, USA).                            |
| Elga Classic UVF ultrapure water purifier system                                                                                                                                             | Elgastat, Bucks, UK                                          |
| Sodium carbonate (Na <sub>2</sub> CO <sub>3</sub> ), sodium nitrite (NaNO <sub>2</sub> ), aluminium chloride hexahydrate (AlCl <sub>3</sub> .6H <sub>2</sub> O), and sodium hydroxide (NaOH) | Sigma-Aldrich Co. (St. Louis, Missouri, USA).                |
| Folin-Ciocalteu (FC) reagent                                                                                                                                                                 | R&M Chemicals (Essex, UK).                                   |
| Dimethyl sulfoxide (DMSO)                                                                                                                                                                    | Bio Basic (Markham, Canada);                                 |
| Eagle's minimum essential medium (EMEM)                                                                                                                                                      | American type culture collection (ATCC) (Rockville, MD, USA) |
| 3-(4, 5-dimethylthiazol-2-yl)-2, 5-diphenyltetrazoliumbromide (MTT), fetal bovine serum (FBS), and phosphate buffered saline (PBS)                                                           | Gibco/BRL Life Technologies Inc. (Eggenstein, Germany).      |
| Doxorubicin hydrochloride                                                                                                                                                                    | EMD Chemicals (Darmstadt, Canada).                           |

**Table S2.** MS/MS data of mitragynine congeners identified tentatively in UAE MeOH ketum leaves extract using UHPLC-ESI-QTOF-MS/MS.

| <b>Identification</b>            | <b>Calculated<br/><i>m/z</i> [M+H]<sup>+</sup></b> | <b>Precursor<br/>ion<br/>experimental<br/><i>m/z</i> [M+H]<sup>+</sup></b> | <b>Elemental<br/>composition</b>                              | <b>Major ions<br/>in MS/MS<br/>spectra<br/>(key<br/>fragment<br/>ions)</b> | <b>UAE<br/>MeOH<br/>RT,<br/>min</b> | <b>Ref</b> |
|----------------------------------|----------------------------------------------------|----------------------------------------------------------------------------|---------------------------------------------------------------|----------------------------------------------------------------------------|-------------------------------------|------------|
| <b>7-<br/>hydroxymitragynine</b> | 415.2227                                           | 415.2083                                                                   | C <sub>23</sub> H <sub>30</sub> N <sub>2</sub> O <sub>5</sub> | 190.0739,<br>110.0865                                                      | 8.47                                | [15, 16]   |
| <b>Corynantheidine</b>           | 369.2170                                           | 369.2031                                                                   | C <sub>22</sub> H <sub>28</sub> N <sub>2</sub> O <sub>3</sub> | 238.1297,<br>226.1310,<br>110.0844                                         | 8.89                                | [15, 16]   |
| <b>Mitragynine</b>               | 399.2278                                           | 399.2136                                                                   | C <sub>23</sub> H <sub>30</sub> N <sub>2</sub> O <sub>4</sub> | 238.1295,<br>226.1297,<br>174.0790,<br>110.0838                            | 9.06                                | [15, 16]   |
| <b>Paynantheine</b>              | 397.2122                                           | 397.1977                                                                   | C <sub>23</sub> H <sub>28</sub> N <sub>2</sub> O <sub>4</sub> | 236.1135,<br>224.1141,<br>174.0788,<br>159.0555                            | 9.43                                | [15, 16]   |
| <b>Speciogynine</b>              | 399.2278                                           | 399.2128                                                                   | C <sub>23</sub> H <sub>30</sub> N <sub>2</sub> O <sub>4</sub> | 238.1290,<br>226.1296,<br>174.0784,<br>110.0853                            | 9.65                                | [15, 16]   |
| <b>Speciociliatine</b>           | 399.2278                                           | 399.2138                                                                   | C <sub>23</sub> H <sub>30</sub> N <sub>2</sub> O <sub>4</sub> | 238.1292,<br>226.1299,<br>174.0787,<br>110.0855                            | 10.25                               | [15, 16]   |

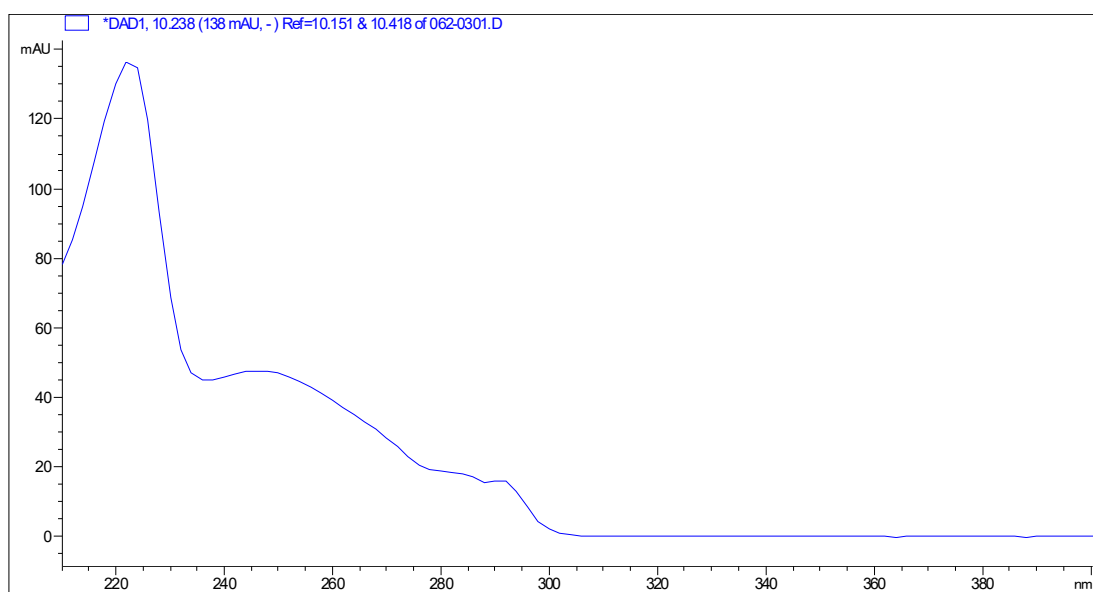

**Figure S1.** Peak purity UV spectrum (HPLC-DAD) of isolated mitragynine.
